# Supplementary material for: Percentile ranks and benchmark estimates of change for the Health Education Impact Questionnaire: Normative data from an Australian sample
Source: PubMed Central journal article supplement — SAGE Open Med. 2017 Mar 23;5:2050312117695716. doi: 10.1177/2050312117695716 (PMC5435365; doi:10.1177/2050312117695716), 2017-03-23
Supplement: Appendix_B.pdf [file Appendix_B.pdf]

## Appendix B: Percentile ranks for the heiQ scales

Table B1: Percentile ranks - Health Directed Activities

| Raw Score | Re-scaled score (1-4) | Baseline        |              |              | Follow-up       |              |              |
|-----------|-----------------------|-----------------|--------------|--------------|-----------------|--------------|--------------|
|           |                       | Percentile Rank | Lower 95% CI | Upper 95% CI | Percentile Rank | Lower 95% CI | Upper 95% CI |
| 4         | 1.0                   | 0.6             | 0.0          | 1.4          | 0.1             | 0.0          | 0.5          |
| 5         | 1.3                   | 1.8             | 1.0          | 2.8          | 0.4             | 0.2          | 0.9          |
| 6         | 1.5                   | 3.4             | 2.2          | 4.7          | 0.9             | 0.4          | 1.5          |
| 7         | 1.8                   | 6               | 4.0          | 7.6          | 1.6             | 1.0          | 2.5          |
| 8         | 2.0                   | 11              | 7.0          | 14.5         | 3.5             | 2.0          | 5.2          |
| 9         | 2.3                   | 19              | 14.0         | 23.9         | 8               | 4.7          | 10.8         |
| 10        | 2.5                   | 29              | 23.4         | 34.5         | 14              | 10.3         | 18.9         |
| 11        | 2.8                   | 41              | 34.0         | 48.4         | 25              | 18.5         | 31.3         |
| 12        | 3.0                   | 59              | 48.4         | 70.5         | 44              | 31.5         | 57.4         |
| 13        | 3.3                   | 76              | 70.5         | 81.9         | 65              | 57.6         | 72.1         |
| 14        | 3.5                   | 85              | 81.2         | 88.0         | 76              | 71.5         | 80.2         |
| 15        | 3.8                   | 90              | 87.2         | 93.2         | 84              | 79.5         | 88.0         |
| 16        | 4.0                   | 96.5            | 92.9         | 99.8         | 94              | 87.8         | 99.7         |

Table B2: Percentile ranks - Positive and Active Engagement in Life

| Raw Score | Re-scaled score (1-4) | Baseline        |              |              | Follow-up       |              |              |
|-----------|-----------------------|-----------------|--------------|--------------|-----------------|--------------|--------------|
|           |                       | Percentile Rank | Lower 95% CI | Upper 95% CI | Percentile Rank | Lower 95% CI | Upper 95% CI |
| 5         | 1.0                   | 0.1             | 0.0          | 0.4          | 0.1             | 0.0          | 0.3          |
| 6         | 1.2                   | 0.4             | 0.1          | 0.8          | 0.2             | 0.1          | 0.5          |
| 7         | 1.4                   | 0.8             | 0.4          | 1.3          | 0.4             | 0.2          | 0.8          |
| 8         | 1.6                   | 1.6             | 0.8          | 2.4          | 0.7             | 0.3          | 1.1          |
| 9         | 1.8                   | 2.6             | 1.8          | 3.5          | 1.0             | 0.6          | 1.6          |
| 10        | 2.0                   | 4.3             | 2.8          | 6.0          | 1.4             | 0.9          | 2.1          |
| 11        | 2.2                   | 8               | 5.5          | 11.4         | 2.9             | 1.5          | 4.4          |
| 12        | 2.4                   | 14              | 10.8         | 17.3         | 6               | 3.8          | 7.9          |
| 13        | 2.6                   | 21              | 16.5         | 25.6         | 10              | 7.3          | 13.1         |
| 14        | 2.8                   | 32              | 25.0         | 38.1         | 18              | 12.7         | 24.2         |
| 15        | 3.0                   | 53              | 38.3         | 66.7         | 40              | 24.6         | 54.7         |
| 16        | 3.2                   | 73              | 67.0         | 78.7         | 62              | 55.0         | 68.9         |
| 17        | 3.4                   | 83              | 78.2         | 87.2         | 74              | 68.4         | 79.3         |
| 18        | 3.6                   | 90              | 86.6         | 92.8         | 83              | 78.6         | 86.8         |
| 19        | 3.8                   | 94              | 92.2         | 96.3         | 90              | 86.2         | 92.9         |
| 20        | 4.0                   | 98.1            | 96.0         | 99.9         | 96.3            | 92.6         | 99.8         |

Table B3: Percentile ranks - Emotional Distress

| Raw Score | Re-scaled score (1-4) | Baseline        |              |              | Follow-up       |              |              |
|-----------|-----------------------|-----------------|--------------|--------------|-----------------|--------------|--------------|
|           |                       | Percentile Rank | Lower 95% CI | Upper 95% CI | Percentile Rank | Lower 95% CI | Upper 95% CI |
| 6         | 1.0                   | 1.2             | 0.0          | 2.6          | 1.9             | 0.1          | 3.9          |
| 7         | 1.2                   | 3.2             | 2.1          | 4.5          | 5               | 3.5          | 7.7          |
| 8         | 1.3                   | 6               | 3.9          | 7.9          | 9               | 7.0          | 11.9         |
| 9         | 1.5                   | 10              | 7.2          | 12.5         | 14              | 11.0         | 16.2         |
| 10        | 1.7                   | 14              | 11.5         | 16.3         | 18              | 15.0         | 20.2         |
| 11        | 1.8                   | 19              | 15.2         | 22.8         | 23              | 19.1         | 26.9         |
| 12        | 2.0                   | 30              | 22.3         | 37.1         | 35              | 26.5         | 44.2         |
| 13        | 2.2                   | 43              | 36.8         | 49.9         | 51              | 44.0         | 57.7         |
| 14        | 2.3                   | 54              | 49.2         | 59.8         | 62              | 57.1         | 67.5         |
| 15        | 2.5                   | 63              | 58.7         | 67.3         | 70              | 66.4         | 74.0         |
| 16        | 2.7                   | 70              | 66.1         | 74.6         | 77              | 72.9         | 81.0         |
| 17        | 2.8                   | 78              | 73.6         | 82.0         | 84              | 80.2         | 87.8         |
| 18        | 3.0                   | 85              | 81.2         | 89.2         | 90              | 87.2         | 93.5         |
| 19        | 3.2                   | 91              | 88.5         | 92.8         | 95              | 92.9         | 96.1         |
| 20        | 3.3                   | 94              | 91.8         | 95.0         | 96.5            | 95.4         | 97.5         |
| 21        | 3.5                   | 95.5            | 94.1         | 96.7         | 97.8            | 96.8         | 98.5         |
| 22        | 3.7                   | 97.1            | 96.0         | 98.1         | 98.5            | 97.9         | 99.0         |
| 23        | 3.8                   | 98.4            | 97.5         | 99.1         | 99.0            | 98.4         | 99.4         |
| 24        | 4.0                   | 99.5            | 98.8         | 100.0        | 99.6            | 99.0         | 100.0        |

Table B4: Percentile ranks - Self-monitoring and Insight

| Raw Score | Re-scaled score (1-4) | Baseline        |              |              | Follow-up       |              |              |
|-----------|-----------------------|-----------------|--------------|--------------|-----------------|--------------|--------------|
|           |                       | Percentile Rank | Lower 95% CI | Upper 95% CI | Percentile Rank | Lower 95% CI | Upper 95% CI |
| 6         | 1.0                   | 0.0             | 0.0          | 0.2          | 0.0             | 0.0          | 0.2          |
| 7         | 1.2                   | 0.1             | 0.0          | 0.3          | 0.0             | 0.0          | 0.2          |
| 8         | 1.3                   | 0.1             | 0.0          | 0.3          | 0.0             | 0.0          | 0.2          |
| 9         | 1.5                   | 0.1             | 0.0          | 0.4          | 0.0             | 0.0          | 0.2          |
| 10        | 1.7                   | 0.2             | 0.1          | 0.5          | 0.1             | 0.0          | 0.3          |
| 11        | 1.8                   | 0.3             | 0.1          | 0.7          | 0.1             | 0.0          | 0.3          |
| 12        | 2.0                   | 0.6             | 0.3          | 1.1          | 0.3             | 0.1          | 0.6          |
| 13        | 2.2                   | 1.3             | 0.7          | 2.2          | 0.5             | 0.2          | 0.9          |
| 14        | 2.3                   | 3.4             | 1.8          | 5.2          | 1.0             | 0.5          | 1.6          |
| 15        | 2.5                   | 8               | 4.8          | 10.5         | 2.2             | 1.2          | 3.4          |
| 16        | 2.7                   | 15              | 10.1         | 19.8         | 5               | 3.0          | 8.0          |
| 17        | 2.8                   | 27              | 19.6         | 35.4         | 13              | 7.7          | 18.6         |
| 18        | 3.0                   | 48              | 35.7         | 61.0         | 34              | 19.1         | 48.8         |
| 19        | 3.2                   | 68              | 61.1         | 74.6         | 57              | 49.2         | 64.8         |
| 20        | 3.3                   | 79              | 74.1         | 84.6         | 71              | 64.5         | 76.6         |
| 21        | 3.5                   | 87              | 84.0         | 90.5         | 81              | 76.0         | 85.2         |
| 22        | 3.7                   | 92              | 89.8         | 94.9         | 88              | 84.5         | 90.9         |
| 23        | 3.8                   | 96.4            | 94.4         | 98.2         | 93              | 90.3         | 95.7         |
| 24        | 4.0                   | 99.1            | 97.9         | 100.0        | 97.8            | 95.4         | 99.9         |

Table B5: Percentile ranks - Constructive Attitudes and Approaches

| Raw Score | Re-scaled score (1-4) | Baseline        |              |              | Follow-up       |              |              |
|-----------|-----------------------|-----------------|--------------|--------------|-----------------|--------------|--------------|
|           |                       | Percentile Rank | Lower 95% CI | Upper 95% CI | Percentile Rank | Lower 95% CI | Upper 95% CI |
| 5         | 1.0                   | 0.1             | 0.0          | 0.3          | 0.1             | 0.0          | 0.3          |
| 6         | 1.2                   | 0.3             | 0.1          | 0.6          | 0.2             | 0.1          | 0.5          |
| 7         | 1.4                   | 0.7             | 0.3          | 1.2          | 0.4             | 0.2          | 0.7          |
| 8         | 1.6                   | 1.2             | 0.7          | 1.8          | 0.6             | 0.3          | 1.0          |
| 9         | 1.8                   | 2.0             | 1.2          | 3.0          | 1.0             | 0.5          | 1.5          |
| 10        | 2.0                   | 3.6             | 2.4          | 5.1          | 1.7             | 1.0          | 2.6          |
| 11        | 2.2                   | 6               | 4.4          | 8.1          | 3.2             | 2.0          | 4.5          |
| 12        | 2.4                   | 10              | 7.3          | 12.8         | 6               | 3.9          | 7.4          |
| 13        | 2.6                   | 15              | 12.0         | 18.6         | 9               | 6.7          | 11.4         |
| 14        | 2.8                   | 23              | 17.9         | 28.3         | 15              | 10.7         | 19.4         |
| 15        | 3.0                   | 47              | 28.8         | 65.7         | 40              | 20.0         | 59.2         |
| 16        | 3.2                   | 71              | 66.0         | 75.4         | 65              | 59.6         | 69.8         |
| 17        | 3.4                   | 78              | 74.4         | 81.1         | 73              | 68.8         | 76.8         |
| 18        | 3.6                   | 83              | 80.0         | 86.4         | 79              | 75.6         | 82.5         |
| 19        | 3.8                   | 89              | 85.5         | 91.9         | 85              | 81.5         | 88.5         |
| 20        | 4.0                   | 95.8            | 91.6         | 99.8         | 94              | 88.2         | 99.7         |

Table B6: Percentile ranks - Skill and Technique Acquisition

| Raw Score | Re-scaled score (1-4) | Baseline        |              |              | Follow-up       |              |              |
|-----------|-----------------------|-----------------|--------------|--------------|-----------------|--------------|--------------|
|           |                       | Percentile Rank | Lower 95% CI | Upper 95% CI | Percentile Rank | Lower 95% CI | Upper 95% CI |
| 4         | 1.0                   | 0.1             | 0.0          | 0.5          | 0.0             | 0.0          | 0.1          |
| 5         | 1.3                   | 0.3             | 0.1          | 0.6          | 0.1             | 0.0          | 0.3          |
| 6         | 1.5                   | 0.7             | 0.3          | 1.4          | 0.2             | 0.1          | 0.5          |
| 7         | 1.8                   | 1.6             | 0.9          | 2.4          | 0.5             | 0.2          | 1.0          |
| 8         | 2.0                   | 5               | 2.1          | 8.5          | 1.3             | 0.6          | 2.2          |
| 9         | 2.3                   | 13              | 8.2          | 17.2         | 3.1             | 1.7          | 4.6          |
| 10        | 2.5                   | 22              | 16.8         | 28.0         | 7               | 4.2          | 10.3         |
| 11        | 2.8                   | 36              | 27.8         | 44.2         | 16              | 10.1         | 22.4         |
| 12        | 3.0                   | 63              | 45.0         | 81.4         | 47              | 23.5         | 71.5         |
| 13        | 3.3                   | 86              | 81.9         | 90.1         | 78              | 72.3         | 82.8         |
| 14        | 3.5                   | 92              | 89.5         | 94.0         | 86              | 82.2         | 89.5         |
| 15        | 3.8                   | 95.5            | 93.4         | 97.4         | 92              | 88.9         | 94.9         |
| 16        | 4.0                   | 98.6            | 97.1         | 100.0        | 97.4            | 94.6         | 99.9         |

Table B7: Percentile ranks - Social Integration and Support

| Raw Score | Re-scaled score (1-4) | Baseline        |              |              | Follow-up       |              |              |
|-----------|-----------------------|-----------------|--------------|--------------|-----------------|--------------|--------------|
|           |                       | Percentile Rank | Lower 95% CI | Upper 95% CI | Percentile Rank | Lower 95% CI | Upper 95% CI |
| 5         | 1.0                   | 0.4             | 0.0          | 0.9          | 0.3             | 0.0          | 0.8          |
| 6         | 1.2                   | 1.1             | 0.6          | 1.8          | 0.7             | 0.4          | 1.2          |
| 7         | 1.4                   | 1.8             | 1.2          | 2.5          | 1.0             | 0.6          | 1.6          |
| 8         | 1.6                   | 2.7             | 1.8          | 3.7          | 1.6             | 1.0          | 2.4          |
| 9         | 1.8                   | 3.9             | 2.9          | 5.0          | 2.3             | 1.6          | 3.1          |
| 10        | 2.0                   | 7               | 4.3          | 9.2          | 4.2             | 2.5          | 6.1          |
| 11        | 2.2                   | 11              | 8.5          | 14.0         | 8               | 5.5          | 9.8          |
| 12        | 2.4                   | 16              | 13.1         | 19.2         | 12              | 9.0          | 14.3         |
| 13        | 2.6                   | 22              | 18.3         | 26.4         | 17              | 13.4         | 20.3         |
| 14        | 2.8                   | 31              | 25.6         | 37.2         | 25              | 19.6         | 30.5         |
| 15        | 3.0                   | 54              | 37.5         | 70.2         | 48              | 30.9         | 64.9         |
| 16        | 3.2                   | 75              | 70.5         | 79.6         | 70              | 65.1         | 74.7         |
| 17        | 3.4                   | 82              | 78.7         | 85.5         | 78              | 73.8         | 81.4         |
| 18        | 3.6                   | 88              | 84.6         | 90.5         | 85              | 80.6         | 88.4         |
| 19        | 3.8                   | 93              | 89.9         | 96.2         | 91              | 87.8         | 94.0         |
| 20        | 4.0                   | 98.1            | 95.9         | 99.9         | 96.9            | 93.7         | 99.9         |

Table B8: Percentile ranks - Health Services Navigation

| Raw Score | Re-scaled score (1-4) | Baseline        |              |              | Follow-up       |              |              |
|-----------|-----------------------|-----------------|--------------|--------------|-----------------|--------------|--------------|
|           |                       | Percentile Rank | Lower 95% CI | Upper 95% CI | Percentile Rank | Lower 95% CI | Upper 95% CI |
| 5         | 1.0                   | 0.1             | 0.0          | 0.4          | 0.1             | 0.0          | 0.4          |
| 6         | 1.2                   | 0.2             | 0.1          | 0.5          | 0.2             | 0.1          | 0.5          |
| 7         | 1.4                   | 0.3             | 0.1          | 0.7          | 0.3             | 0.1          | 0.5          |
| 8         | 1.6                   | 0.6             | 0.3          | 1.0          | 0.4             | 0.2          | 0.8          |
| 9         | 1.8                   | 0.9             | 0.5          | 1.5          | 0.5             | 0.3          | 0.9          |
| 10        | 2.0                   | 1.7             | 1.0          | 2.7          | 0.9             | 0.4          | 1.6          |
| 11        | 2.2                   | 3.4             | 2.1          | 4.8          | 2.2             | 1.2          | 3.4          |
| 12        | 2.4                   | 6               | 4.1          | 7.9          | 4.1             | 2.8          | 5.6          |
| 13        | 2.6                   | 10              | 7.2          | 13.7         | 7               | 4.9          | 8.8          |
| 14        | 2.8                   | 18              | 13.1         | 22.7         | 12              | 8.2          | 16.0         |
| 15        | 3.0                   | 43              | 23.3         | 62.2         | 37              | 16.7         | 56.4         |
| 16        | 3.2                   | 68              | 62.6         | 72.9         | 62              | 56.9         | 67.8         |
| 17        | 3.4                   | 76              | 72.0         | 79.9         | 71              | 66.8         | 74.5         |
| 18        | 3.6                   | 82              | 78.9         | 85.9         | 77              | 73.4         | 81.1         |
| 19        | 3.8                   | 89              | 85.2         | 92.7         | 84              | 80.2         | 88.4         |
| 20        | 4.0                   | 96.3            | 92.4         | 99.8         | 94              | 88.2         | 99.7         |
